## Glucose Variability; Does It Matter?

Sarah E. Siegelaar, Frits Holleman, Joost B. L. Hoekstra, and J. Hans DeVries

Academic Medical Centre, Department of Internal Medicine, 1105 AZ Amsterdam, The Netherlands

Overall lowering of glucose is of pivotal importance in the treatment of diabetes, with proven beneficial effects on microvascular and macrovascular outcomes. Still, patients with similar glycosylated hemoglobin levels and mean glucose values can have markedly different daily glucose excursions. The role of this glucose variability in pathophysiological pathways is the subject of debate. It is strongly related to oxidative stress in *in vitro*, animal, and human studies in an experimental setting. However, in real-life human studies including type 1 and type 2 diabetes patients, there is neither a reproducible relation with oxidative stress nor a correlation between short-term glucose variability and retinopathy, nephropathy, or neuropathy. On the other hand, there is some evidence that long-term glycemic variability might be related to microvascular complications in type 1 and type 2 diabetes. Regarding mortality, a convincing relationship with short-term glucose variability has only been demonstrated in nondiabetic, critically ill patients. Also, glucose variability may have a role in the prediction of severe hypoglycemia. In this review, we first provide an overview of the various methods to measure glucose variability. Second, we review current literature regarding glucose variability and its relation to oxidative stress, long-term diabetic complications, and hypoglycemia. Finally, we make recommendations on whether and how to target glucose variability, concluding that at present we lack both the compelling evidence and the means to target glucose variability separately from all efforts to lower mean glucose while avoiding hypoglycemia. (*Endocrine Reviews* 31: 171–182, 2010)

- I. Introduction
- II. Different Methods for Glucose Variability Measurement
- III. Contribution of Glucose Variability to Oxidative Stress
- IV. Contribution of Glucose Variability to Diabetic Complications and Poor Outcomes in Critically Ill Patients
- V. Glucose Variability as a Predictor of Severe Hypoglycemia
- VI. Clinical Recommendations
  - A. Should glucose variability be a target for intervention?
  - B. Available options to target glucose variability
- VII. Conclusions and Future Perspectives

### I. Introduction

**P**atients with similar mean glucose or glycosylated hemoglobin (HbA1c) values can have markedly different daily glucose profiles, with differences both in number and duration of glucose excursions. Hyperglycemia is thought to induce oxidative stress and interfere with normal endothelial function by overproduction of reactive oxygen species, which results in diabetic complications through several molecular mechanisms (1, 2) (Fig. 1). In addition, glucose variability might contribute to these pro-

cesses as well. Since the publication of the results of the Diabetes Control and Complications Trial (DCCT) in the early 1990s (3, 4), the topic of glucose variability as a contributor to diabetic complications has been debated. It was suggested that glucose variability might explain the difference in microvascular outcome between the intensively and conventionally treated type 1 diabetes patients with the same mean HbA1c throughout the trial (5). Although this hypothesis was refuted recently by the statisticians of the DCCT/Epidemiology of Diabetes Interventions and Complications (EDIC) themselves (6), subsequent hypotheses on the relation of glucose variability to oxidative stress in type 2 diabetes patients and to mortality in patients with stress hyperglycemia have been postulated.

Glucose variability and lack of predictability are issues that diabetes patients and doctors encounter in daily practice. In this review article, we will first provide an overview of the various methods to measure glucose variability. Second, we review the current evidence for the relation between glucose variability and oxidative stress, long-term

ISSN Print 0021-972X ISSN Online 1945-7197  
Printed in U.S.A.

Copyright © 2010 by The Endocrine Society  
doi: 10.1210/er.2009-0021 Received May 28, 2009. Accepted October 7, 2009.  
First Published Online December 4, 2009

Abbreviations: 1,5-AG, 1,5-Anhydroglucitol; CF, cortical fibroblast(s); CGM, continuous glucose measurement; CONGA, continuous overlapping net glycemic action; CV, coefficient of variation; HbA1c, glycosylated hemoglobin; ICU, intensive care unit; MAGE, mean amplitude of glycemic excursions; MODD, mean of daily differences; PGF<sub>2α</sub>, prostaglandin F<sub>2α</sub>; PICU, pediatric ICU; PTC, proximal tubule cell(s); SMBG, self-monitored blood glucose.

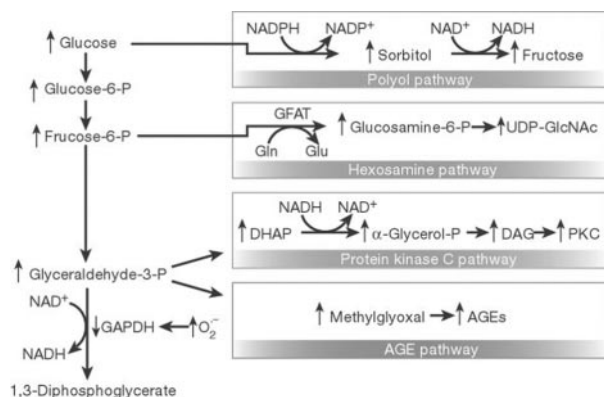

**Fig. 1.** Potential mechanism by which hyperglycemia-induced mitochondrial superoxide overproduction activates four pathways of hyperglycemic damage. [Reproduced with permission from M. Brownlee: *Nature* 414:813–820, 2001 (1) © Macmillan Publishers, Ltd.]

diabetic complications, and severe hypoglycemia. Lastly, we will make recommendations for treatment with regard to targeting glucose variability. We performed a structured literature search using PubMed and Embase according to the PICO (patient, intervention, comparison, and outcome) method (7), including relevant literature published online up to March 2009.

Especially in type 2 diabetes, postprandial hyperglycemia contributes to individual glucose variability. However, because postprandial hyperglycemia is different from glucose variability as defined above, we will not discuss this further, other than to say that the positive relationship between postprandial hyperglycemia and cardiovascular risk supports the possibility that glucose variability may be related to cardiovascular risk as well (8).

## II. Different Methods for Glucose Variability Measurement

There are several methods to quantify glucose variability, but there is no universally accepted “gold standard.” Figure 2 describes the formulas underlying the different measures and their characteristics. Most authors consider glycemic variability as a standard of intraday variation, reflecting the swings of blood glucose in a diabetic patient as a consequence of diminished or absent autoregulation and the shortcomings of insulin therapy.

The easiest way to get an impression of the glucose variability in an individual patient is to calculate the SD of glucose measurements and/or the coefficient of variation (CV), if one wishes to correct for the mean. It is possible to calculate SD and CV from seven-point glucose curves, facilitating their use in daily practice. On the other hand, when obtaining seven-point glucose curves, certain peaks or nadirs will always be missed simply because they occur between two measurements, making this method less

accurate. Calculating SD and CV from continuous glucose measurement (CGM) data seems preferable, but in daily practice it is impossible to obtain CGM data from each individual patient. Also, the extent to which CGM-assessed SD differs from that calculated from seven-point profiles has not, to our knowledge, been formally investigated.

In 1964, Schlichtkrull *et al.* (9) defined a new measure, the M-value, trying to quantify glycemic control of diabetes patients. It is a measure of the stability of the glucose excursions in comparison with an “ideal” glucose value of 6.6 mmol/liter (120 mg/dl), developed using six self-monitored blood glucose (SMBG) values per 24 h in 20 patients with type 1 diabetes. Later, other “ideal” glucose levels from 4.4 to 5.6 mmol/liter (80 to 100 mg/dl) were proposed to obtain the best formula (10). In the final formula, choice of the ideal glucose value is left up to the investigator, making it difficult to compare different studies that use different ideal glucose values. The M-value is zero in healthy controls, rising with increasing glycemic variability or poorer glycemic control, making it difficult to distinguish between patients with either high mean glucose or high glucose variability. Moreover, because hypoglycemia has a greater impact on the M-value than hyperglycemia, it is more a clinical than a mathematical indicator of glycemic control.

In 1970, Service *et al.* (11) described a method that is widely used nowadays: the mean amplitude of glycemic excursions (MAGE). Developed using hourly blood glucose sampling for 48 h, this method generates a value for the variation around a mean glucose value by summing the absolute rises or falls encountered in a day. The reference point here is the mean glucose value rather than an arbitrarily chosen ideal value. Arbitrarily, it ignores excursions of less than 1 SD. This may incorrectly disregard possibly important smaller excursions. MAGE was originally defined from hourly glucose sampling for 48 h in 14 patients. Thus, it has never been formally validated for calculation from seven-point glucose profiles; neither do we know how the MAGE calculated from CGM data corresponds to the originally developed value.

An intraday measurement of glycemic variability specifically developed for use on CGM data was proposed in 1999 by McDonnell *et al.* (12), *i.e.*, continuous overlapping net glycemic action (CONGA-*n*). It is calculated as the SD of the summated differences between a current observation and an observation *n* hours previously. Because CONGA does not require arbitrary glucose cutoffs or arbitrarily defined rises and falls, it seems to be a more objective manner to define glucose variability than M-value or MAGE. It is proposed for CONGA-1, CONGA-2, and

| Variability measure | Formula                                                                                                                                                       | Explanation of symbols                                                                                                                                                                                                                                                                                                             | Discriminating feature                   |
|---------------------|---------------------------------------------------------------------------------------------------------------------------------------------------------------|------------------------------------------------------------------------------------------------------------------------------------------------------------------------------------------------------------------------------------------------------------------------------------------------------------------------------------|------------------------------------------|
| SD                  | $\sqrt{\frac{\sum (x_i - \bar{x})^2}{k-1}}$                                                                                                                   | $x_i$ = individual observation<br>$\bar{x}$ = mean of observations<br>$k$ = number of observations                                                                                                                                                                                                                                 | easy to determine, extensively used      |
| CV                  | $\frac{s}{\bar{x}}$                                                                                                                                           | $s$ = standard deviation<br>$\bar{x}$ = mean of observations                                                                                                                                                                                                                                                                       | easy to determine, SD corrected for mean |
| adjusted M-value    | $M_{GR} + M_W$<br>where<br>$M_{GR} = \frac{\sum_{t=t_1}^{t_2} \left  10 \log \frac{GR_t}{IGV} \right ^3}{n}$<br>and<br>$M_W = \frac{G_{\max} - G_{\min}}{20}$ | $M_{GR}$ = M-value for glucose readings<br>$M_W$ = correction factor for $n < 24$<br>$GR_t$ = glucose reading at time $t$<br>$IGV$ = ideal glucose value<br>$t_i$ = time in minutes after start of observations of the $i^{\text{th}}$ observation<br>$G_{\max}$ = maximum glucose reading<br>$G_{\min}$ = minimum glucose reading | not a pure variability measure           |
| MAGE                | $\sum \frac{\lambda}{n}$<br>if $\lambda > v$                                                                                                                  | $\lambda$ = each blood glucose increase or decrease (nadir-peak or peak nadir)<br>$n$ = number of observations<br>$v$ = 1 SD of mean glucose for 24-hr period                                                                                                                                                                      | used most extensively                    |
| CONGA               | $\sqrt{\frac{\sum_{t=t_1}^{t_2} (D_t - \bar{D})^2}{k^* - 1}}$<br>where<br>$D_t = GR_t - GR_{t-m}$<br>and<br>$\bar{D} = \frac{\sum_{t=t_1}^{t_2} D_t}{k^*}$    | $k^*$ = number of observations where there is an observation $n \times 60$ minutes ago<br>$m = n \times 60$<br>$D_t$ = difference between glucose reading at time $t$ and $t$ minus $n$ hours ago                                                                                                                                  | specifically developed for CGM           |
| MODD                | $\frac{\sum_{t=t_1}^{t_2}  GR_t - GR_{t-1440} }{k^*}$                                                                                                         |                                                                                                                                                                                                                                                                                                                                    | inter-day variation                      |

SD=standard deviation; CV=coefficient of variation; MAGE=mean amplitude of glycemic excursions; CONGA=continuous overall net glycemic action; MODD=mean of daily differences; SMBG=self monitored blood glucose; CGM=continuous glucose monitoring. Units are in mmol/l or mg/dl depending on the unity of the glucose values measured. To convert glucose values from mg/dl to mmol/l multiply by 0.0555.

Fig. 2. Formulas used in describing glucose variability.

CONGA-4, but it is not known which, if any, of these is preferable.

When examining glucose variability, the interday variation in blood glucose is also of interest. In 1972, Molnar *et al.* (13) observed different day to day glucose patterns in patients with a similar MAGE. They proposed the absolute mean of daily differences (MODD) as a supplement to the MAGE and mean blood glucose. The MODD is the mean absolute value of the differences between glucose values on 2 consecutive days at the same time. In daily practice, eating habits play an interfering role because different mealtimes will influence MODD. Developed using hourly blood sampling during 48 h, the validity of its use on seven-point glucose curve data or CGM is unknown.

The most straightforward and easy way to measure interday variability is calculating the SD of fasting blood glucose concentrations (14). However, it is more a measure of long-term glucose variability because it takes values of at least 2 consecutive days to calculate. Above all, fasting glucose variability neglects the variability in all other intraday glucose values.

Besides the commonly used measurements described above, several other methods have been proposed that have not gained widespread use: the blood glucose rate of change, computed for CGM, describing the magnitude of temporal fluctuations of blood glucose levels using logarithmically transformed glucose data (15–17); the mean absolute difference of consecutive glucose values, vali-

dated for SMBG curves (18); the “J”-index, defined as the square of the mean plus SD of glucose measurements, excluding severe and persistent hypoglycemia, which is validated for SMBG curves (19); and the lability index, based on the change in glucose levels over time (20). The complexity of the calculations (17) or substantial similarity with other measures (18, 19) probably underlie their limited use.

The MAGE is most commonly used for CGM data and SD/CV for SMBG curves. It has to be mentioned that blood glucose values are seldom normally distributed, a mathematical condition for use of the SD (16). In literature, this limitation is mostly ignored. However, for SMBG strong correlations between variability measures, expressed as SD and mean absolute difference, have been described (18). Using data from a previous study (21), we also identified strong and significant correlations between cited variability measures ( $r = 0.63$ – $0.93$ ;  $P = 0.01$ ; our unpublished data), suggesting a high degree of overlap between the different measures when using CGM data. Because the SD correlates highly with all other variability measures, it seems of little concern that the SD does not take the number of glycemic swings into account (Fig. 3), whereas the calculation of MAGE, MODD, and CONGA is based on this. Whether calculating MAGE, MODD, CONGA, or other measures simultaneously helps to get additional insight in pathophysiological processes needs further investigation. A further complication is that the time needed to reliably assess a given standard of variability is not known. Preliminary results suggest that this may take several days of CGM measurements (22).

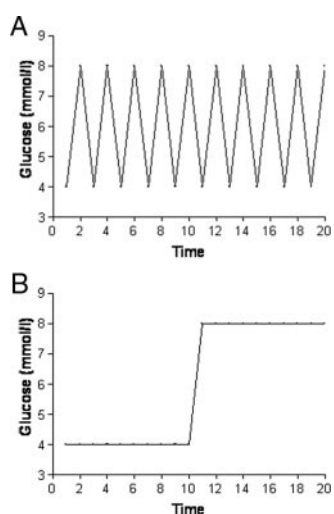

**Fig. 3.** Two fictitious patients with identical mean glucose and SD, but different patterns of variability. A and B are two different patients with different patterns of variability but the same mean glucose (6.0 mmol/liter) and SD (2.1). SD is calculated as the square root of the variance:  $\sqrt{\frac{\sum(x_i - \bar{x})^2}{k - 1}}$ , where  $x_i$  is the sample of the  $i^{\text{th}}$  observation,  $\bar{x}$  the mean of all the observations, and  $k$  is the number of observations.

In addition to methods to quantify glucose variability derived from direct glucose measurements, serum determination of 1,5-anhydroglucitol (1,5-AG) has been suggested as a measure of glycemic excursions (23). 1,5-AG is a polyol kept within stable limits in subjects with glucose values in the normal range. Its reabsorption in the kidney is inhibited by excessive excretion of urinary glucose; the higher the plasma glucose concentration, the lower the plasma 1,5-AG concentration (24). Urinary glucose appears at a plasma glucose concentration of approximately 8.8–10.5 mmol/liter (160–190 mg/dl), so despite a very quick response of this marker to changes in plasma glucose levels, it seems of little use detecting glucose fluctuations below this range. Also, the correlation between glucose variability and 1,5-AG is weak when HbA1c values are above 8% (25, 26). Measurement of 1,5-AG concentrations seems therefore only of use when looking at hyperglycemic excursions, *i.e.*, postprandial hyperglycemia in patients with an HbA1c below 8%.

In summary, we suggest SD as the preferable method when quantifying variability from CGM data because this is the easiest and best validated measure. Also, as further explained below, SD was the measure used in the only field so far where a relation between glucose variability and hard outcomes could be demonstrated, *i.e.*, mortality in intensive care unit (ICU) patients.

### III. Contribution of Glucose Variability to Oxidative Stress

The current hypothesis about the link between hyperglycemia and diabetic complications suggests that the hyperglycemia-driven formation of reactive oxygen species enhances four mechanisms of tissue damage: the polyol pathway, the hexosamine pathway, protein kinase C activation, and formation of advanced glycation end-products (1) (Fig. 1). It should, however, be noted that at this time no human intervention studies have been published that establish a causal relation between oxidative stress and micro- or macrovascular complications (27). Moreover, daily antioxidant supplementation does not reduce the risk of cardiovascular events and microvascular complications (28). However strong the evidence supporting the concept of hyperglycemia-induced oxidative stress may be, the role of glycemic variability in the formation of oxidative stress is much more controversial. *In vitro*, animal and human studies in experimental settings consistently report a deleterious effect of intermittent high glucose, either larger than or as large as constant high glucose, despite less total glucose exposure, but these findings cannot be reproduced in real-life human studies.



Quagliaro *et al.* (29) and Piconi *et al.* (30) demonstrated that intermittent high glucose levels stimulate reactive oxygen species overproduction leading to increased cellular apoptosis in human umbilical vein endothelial cells compared with a stable high glucose environment. In these studies, three groups of cells were compared, each group receiving a different fresh medium every 24 h for 14 d: a continuously normal glucose medium (5 mmol/liter), a continuously high glucose medium (20 mmol/liter), and normal and high glucose media alternating every 24 h (5 and 20 mmol/liter, respectively).

The effect of glycemic variation *vs.* constant high glucose was also studied in cells of the kidney. Takeuchi *et al.* (31) examined the effects of periodic changes in extracellular glucose concentration on matrix production and proliferation of cultured rat mesangial cells. Mesangial cell matrix production, measured as collagen III and IV protein production and DNA level, was examined as a marker of cell proliferation and nephropathy development (32, 33). Three groups of cells were used, receiving a different glucose medium every 24 h (5 mmol/liter, alternating 5 and 25 mmol/liter, and 25 mmol/liter, respectively) for 10 d. They reported a significantly larger collagen III and IV protein and DNA production in the alternating glucose group compared with the continuous high glucose group. No mechanism for these effects was demonstrated.

Jones *et al.* (34) investigated the effects of constant and intermittently increased glucose on human kidney proximal tubule cells (PTC) and cortical fibroblasts (CF). In this study, cell growth was assessed by thymidine uptake as an index of DNA synthesis, collagen synthesis as a marker of extracellular matrix production, and protein content. They exposed three groups of cells for 4 d to 6.1 mmol/liter, 25 mmol/liter, or alternating 6.1 and 25 mmol/liter glucose with daily medium change. Overall, the alternating glucose cells showed larger thymidine uptake (PTC and CF) and more collagen synthesis (CF) than the cells exposed to a stable high glucose medium. Nevertheless, no differences between the high and intermittent glucose groups were found in cell protein content in both PTC and CF. On the cytokine level, alternating high glucose activated more TGF- $\beta$ 1 and IGF binding protein-3 than stable high glucose, suggesting more collagen synthesis, potential apoptosis, and biological activity of IGF-I, which has been implicated in the development of diabetic nephropathy (35, 36).

Horv  th *et al.* (37) built on these findings and compared the effect of nontreated diabetes (continuous high glucose) with intermittently insulin-treated diabetes (oscillating glucose) on the development of endothelial dysfunction in 19 male Wistar rats. After 10 d of insulin treat-

ment, they monitored blood glucose levels every 6 h for 48 h in total. After these 48 h the rats were killed, and organs were harvested. Their main finding was that the intermittently treated rats showed a significantly larger impairment in endothelial function compared with the nontreated animals despite lower total glucose exposure, with indications for an effect of the poly(ADP-ribose) polymerase pathway.

The human studies performed are less consistent in their findings. Ceriello *et al.* (38) performed a normoinsulinemic hyperglycemic glucose clamp study investigating the relation between glucose variability, oxidative stress [assessed as plasma 3-nitrotyrosine and 24-h excretion rates of free 8-iso-prostaglandin  $F_{2\alpha}$  (8-iso-PGF $_{2\alpha}$ )], and endothelial function, measured by flow-mediated dilatation. Type 2 diabetic patients as well as healthy controls were studied. They suggested that an oscillating glucose level has more deleterious effects on endothelial function and enhances oxidative stress more than a constant high glucose level. To mimic glucose variability, glycemia was increased from 5 to 15 mmol/liter and back every 6 h for 24 h. Stable hyperglycemia conditions at 10 and 15 mmol/liter for 24 h were the comparators.

It can be debated how many consecutive periods with alternating degrees of glycemia are necessary to reliably assess glycemic variability rather than the effect of repeated stimuli. From the field of pituitary function assessment, it is known that repeated stimuli can result either in extinction of the response or exaggerated response (39). Also, in everyday life, glucose swings of a patient with diabetes have a duration of less than 6 h and occur more frequently than the two 6-h cycles used in the study performed by Ceriello *et al.* (38). As already acknowledged in one of these manuscripts (31), the duration of alternating glycemia is also an important comment on the *in vitro* studies described earlier because they alternate their glucose media every 24 h.

Three studies investigated the correlation between glucose variability assessed using CGM and oxidative stress in a nonintervention design (Fig. 4). These studies calculated the MAGE to assess glucose variability and 24-h urinary excretion rates of 8-iso-PGF $_{2\alpha}$  to assess oxidative stress. The first study was performed by Monnier *et al.* (40) in 21 type 2 diabetes patients. They found a strong correlation between glucose variability and oxidative stress ( $r = 0.86$ ;  $P < 0.001$ ). The second study was performed by Wentholt *et al.* (21) in 25 type 1 diabetes patients. They expected to find an even stronger correlation because of the greater glucose variability in type 1 diabetes patients, but they could not confirm the findings of Monnier ( $r = 0.28$ ; no  $P$  value reported). A possible explanation for this discrepancy is that the studies used a different method to quantify 8-iso-PGF $_{2\alpha}$  excretion rates. Tandem

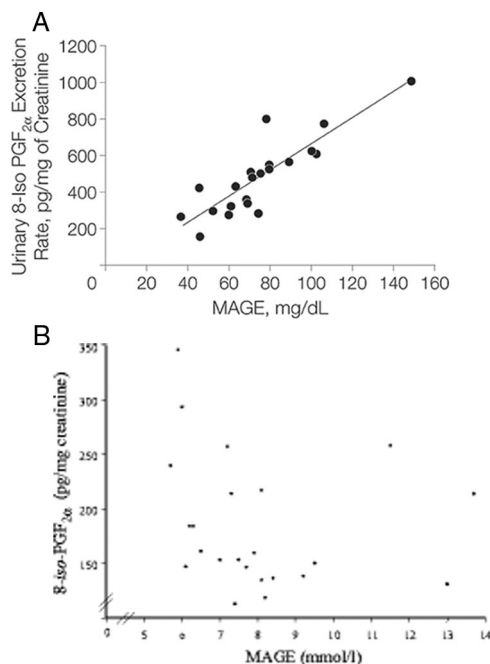

**Fig. 4.** Different relations between glucose variability and oxidative stress in type 2 and type 1 diabetes. Correlation between glucose variability, expressed as MAGE, and oxidative stress, expressed as urinary excretion rate of 8-iso-PGF<sub>2α</sub> in type 2 (A) and type 1 (B) diabetes patients. A,  $r = 0.86$ ; B,  $r = 0.26$ . [Panel A is reproduced with permission from L. Monnier, *et al.*: *JAMA* 295:1681–1687, 2006 (40) © American Medical Association. Panel B is reproduced from Fig. 3 with kind permission from I.M. Wentholt, *et al.*: *Diabetologia* 51:183–190, 2008 (21) © Springer Science + Business Media.]

mass spectrometry, used by Wentholt, is not hampered by cross-reactivity of structurally (un)related components of 8-iso-PGF<sub>2α</sub>, whereas the immunoassay used by Monnier is more susceptible to interference (40). To solve this contradiction, our group reexamined this relationship in 24 type 2 diabetes patients quantifying urinary 8-iso-PGF<sub>2α</sub> excretion rates with tandem mass spectrometry (41). We could not reproduce a relationship between glucose variability and oxidative stress ( $r = 0.12$ ;  $P = 0.53$ ).

One intervention trial has been performed to assess the effect of lowering glucose variability on oxidative stress (42). This crossover trial compared the effect of a basal insulin regimen and a mealtime insulin regimen on glucose variability and oxidative stress in type 2 diabetes using CGMS data ( $n = 40$ ). Although glucose variability tended to be lower (9%;  $P =$  nonsignificant) in the mealtime insulin group, no difference in oxidative stress was found. If anything, there was more oxidative stress in the mealtime insulin group. Again, no correlation between glucose variability and oxidative stress determined by 24-h urinary excretion rates of 8-iso-PGF<sub>2α</sub> was seen in these insulin-treated type 2 patients. In this study, 8-iso-PGF<sub>2α</sub> was quantified by tandem mass spectrometry.

Summarizing, *in vitro* studies do show a relationship between glycemic variability and oxidative stress-induced

apoptosis and renal cell proliferation in cultured human or rat cells. These findings are confirmed in an animal study, but this relation could not be consistently reproduced in human studies. Differences in duration and frequency of the periods with alternating glycemia as well as differences in methods used for oxidative stress quantification are possible explanations for these discrepant findings.

#### IV. Contribution of Glucose Variability to Diabetic Complications and Poor Outcomes in Critically Ill Patients

The most important issue for clinical practice is whether glucose variability contributes to morbidity and mortality irrespective of the pathophysiological mechanism. This issue was studied retrospectively in type 1 diabetes patients (6, 43–47) and in critically ill patients at the adult (48–50) and pediatric (51, 52) ICU.

The DCCT, a randomized controlled trial which included 1441 patients with type 1 diabetes, presented statistical models in 1995 suggesting a connection between variability in blood glucose and the occurrence of microvascular complications (4). At similar HbA1c levels throughout the study, patients from the conventionally treated group were thought to be at higher risk for microvascular complications, particularly progression of retinopathy, than those in the intensively treated group. Kilpatrick *et al.* (43, 44) independently performed analyses of the data of the DCCT showing that the variability in blood glucose around a patient's mean value (SD) was not related to the development or progression of either retinopathy or nephropathy in type 1 diabetes patients. More than 10 yr later, the DCCT statisticians themselves corrected their previous findings and refuted the relation suggested earlier (6). As opposed to short-term glucose variability, long-term fluctuations in glycemia, expressed as HbA1c variability, may contribute to the development of retinopathy and nephropathy in the DCCT group (45).

Bragd *et al.* (46) performed a prospective observational study in 100 type 1 diabetes patients, collecting five-point self-monitoring glucose data for 4 wk. Data on the incidence and prevalence of micro- and macrovascular complications as well as peripheral neuropathy were obtained during an 11-yr follow-up. This study confirmed the findings of the studies mentioned previously in this section, finding no relationship between short-term glucose variability measured as SD and microvascular complications. However, they found that glucose variability was significantly related to the presence of peripheral neuropathy and was a borderline predictor of its incidence (hazard ratio, 1.73;  $P = 0.07$ ), suggesting that the nervous system

may be vulnerable to glycemic variability. On the other hand, recent analysis of the more extensive DCCT datasets did not show any relation between glucose variability and the prevalence of diabetic peripheral as well as autonomic neuropathy (47).

A single study in type 2 diabetes patients examined the effect of glucose variability on retinopathy (53). The coefficient of variation of fasting plasma glucose was retrospectively calculated in 130 patients without retinopathy at baseline with an average follow-up of 5.2 yr. The frequency of glucose measurements ranged from quarterly to yearly, so long-term variability of fasting plasma glucose was assessed. The highest quartile of variation in fasting plasma glucose contributed to diabetic retinopathy independently from and in addition to HbA1c (odds ratio, 3.68;  $P = 0.049$ ). This finding is in line with the above-noted relation of long-term fluctuations in glycemia to the development of retinopathy in type 1 diabetes (45).

Recently, a randomized controlled trial was published comparing the effects of a prandial and a basal insulin regimen with respect to cardiovascular outcomes in type 2 diabetes patients after acute myocardial infarction (HEART2D Trial, Ref. 54). The authors concluded that a significant difference in postprandial glucose values, while achieving comparable HbA1c values, was not associated with a difference in cardiovascular outcome. Glucose variability was not separately assessed, but visual evaluation of the mean glucose profiles collected during the study seems to show a difference in glucose variability in favor of the prandial insulin group that did not translate into improved outcome (Fig. 5).

Glucose variability has also been studied in critically ill patients. Three different groups performed retrospective analyses of glucose variability as a predictor of mortality at the adult ICU (48–50). All three groups concluded that glucose variability measured as SD was a significant predictor of mortality in critically ill patients independently from severity of illness. The finding that mortality significantly increased with variability in different strata of mean glucose level (50) contributes to the suggestion that variability is a predictor of mortality independent from mean glucose level (Fig. 6). Egi *et al.* (49) performed a subgroup analysis of patients with diabetes. Interestingly, in this group glucose control, as assessed by the SD and mean glucose, displayed no relation with survival in contrast to patients without diabetes. These results may suggest that patients with diabetes “get accustomed” to fluctuating glucose levels, making them less devastating.

Not only in the adult ICU, but also in two different pediatric ICUs (PICUs), the influence of glycemic variability was studied. Wintergerst *et al.* (52) retrospectively reviewed all PICU admissions of 1 yr, excluding patients

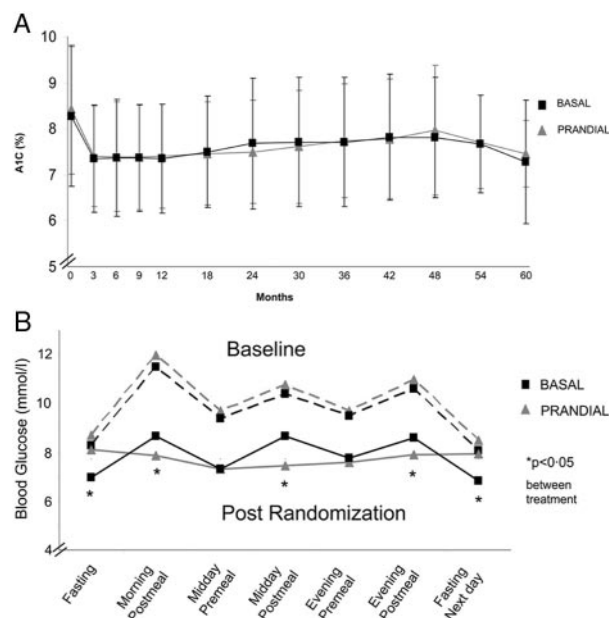

**Fig. 5.** Glycemic measures in a randomized controlled trial comparing a prandial with a basal insulin regimen. A, Mean (SD) HbA1c by treatment strategy. B, Seven-point mean SMBG profiles at baseline (dotted line) and throughout the study (solid line) by treatment strategy. [Reproduced from Fig. 2 with permission from I. Raz, *et al.*: *Diabetes Care* 32:381–386, 2009 (54) © American Diabetes Association in the format Journal via Copyright Clearance Center.]

with a known diagnosis of diabetes mellitus ( $n = 1094$ ). Glucose variability was assessed as the mean of the absolute differences between sequential glucose values divided by the differences in collection time. The second retrospective cohort analysis was performed by Hirshberg *et al.* (51). They included all PICU admissions with a length of stay of more than 24 h in 1 yr, excluding patients above 18 yr of age, patients with known diabetes mellitus, or when insulin therapy was administered during PICU stay ( $n = 863$ ). Glucose variability was described as a patient who suffered from both hyperglycemia ( $\geq 8.3$  mmol/liter) and hypoglycemia ( $\leq 3.3$  mmol/liter) during PICU stay, which occurred in 6.8% of all patients. Both of these studies

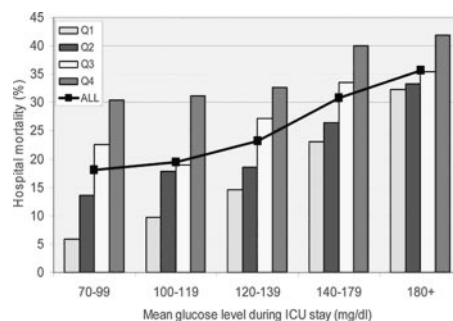

**Fig. 6.** Hospital mortality related to mean glucose and glycemic variability. Q1, Lowest quartile of glycemic variability; Q4, highest quartile of glycemic variability. To convert mean glucose from mg/dl to mmol/liter, multiply by 0.0555. [Reproduced from Fig. 1 with permission from J.S. Krinsley: *Crit Care Med* 36:3008–3013, 2008 (50) © Wolters Kluwer Health.]

confirmed the earlier described adult data showing that glucose variability is associated with mortality and increased length of stay in this population, and they even show a stronger association than hyperglycemia, although only the latter study was adjusted for severity of illness in multivariate analysis.

van den Berghe *et al.* (55) published a landmark trial in 2001 showing a dramatic 42% relative reduction in mortality in the surgical ICU when blood glucose was normalized to 4.4–6.1 mmol/liter compared with 9.9–11.0 mmol/liter. Recently, the purported benefits of tight glycemic control in the ICU have been challenged. The NICE-SUGAR study (56) showed that intensive glucose control (4.5–6.0 mmol/liter compared with <10 mmol/liter) increased mortality among adults in the ICU (odds ratio, 1.14; confidence interval, 1.02–1.28). One possible explanation for these conflicting results is a differential effect on glucose variability in these studies because this is strongly associated with mortality in this population (48–50). The results of the van den Berghe study showed a substantially lower SD in the intensively treated group (SD of morning blood glucose, 19 *vs.* 33 mg/dl in the intensively *vs.* conventionally treated groups, respectively) as opposed to the NICE-SUGAR study where SD of morning blood glucose was equal in both groups (25 and 26 mg/dl in the intensively and conventionally treated groups, respectively).

We can draw a few conclusions from these studies. First, a relation between short-term glucose variability and microvascular or neurological complications has not been proven in type 1 diabetes patients and has not been investigated in type 2 diabetes. Second, no studies have been performed investigating the influence of glucose variability on macrovascular complications and death in either type 1 or type 2 diabetes patients, but the HEART2D trial suggests that lowering glucose variability does not improve cardiovascular outcome in type 2 diabetes patients after acute myocardial infarction. In contrast, glucose variability is clearly related to mortality in critically ill patients without diabetes, but intervention trials are still lacking.

## V. Glucose Variability as a Predictor of Severe Hypoglycemia

Hypoglycemia is a complication of diabetes treatment with sometimes severe consequences, such as seizures, accidents, coma, and death. The frequency of severe hypoglycemia increases exponentially when lowering blood glucose (3). Because lowering blood glucose is the main goal of the treatment of diabetes, occurrence of hypoglycemia is a frequent problem. Much harm could be avoided if it were possible to predict severe hypoglycemia. Unfor-

tunately, only a modest percentage of future severe hypoglycemic episodes can be predicted from known variables such as history of severe hypoglycemia and hypoglycemia awareness (57, 58).

In the search for possible predictors, glucose variability is a plausible candidate because severe hypoglycemia is preceded by blood glucose disturbances (59), and several studies reported a decline in the occurrence of hypoglycemia coinciding with lower glucose variability (60–62). In 1994, Cox *et al.* (63) described glucose variability as a more powerful predictor of future severe hypoglycemia than HbA1c. In this study, 87 type 1 diabetes patients prone to severe hypoglycemia were included. Fifty SMBG readings were collected during 2 to 3 wk, and severe hypoglycemia occurrence was recorded for the subsequent 6 months.

The Diabetes Outcomes in Veterans Study (DOVES) (64) developed and subsequently validated a model for predicting hypoglycemia based on the idea that hypoglycemia is more likely if the mean blood glucose is low or if negative deviations from the mean are large. The 195 insulin-treated type 2 diabetes patients included collected SMBG glucose values four times daily for 8 wk and had three follow-up visits in 1 yr. In this model, the risk of hypoglycemia of any severity (blood glucose  $\leq$  3.33 mmol/liter) appeared to be unique to each subject and was as much related to glucose variability as to the mean glucose value. The authors suggested that minimizing glucose variability is a plausible method for offsetting the increased risk of hypoglycemia associated with tight glycemic control. Unfortunately, how glycemic variability could be targeted separately remains unclear.

Kilpatrick *et al.* (65) used the datasets of the DCCT to establish whether mean blood glucose and/or glucose variability add to the predictive value of HbA1c for hypoglycemia risk in type 1 diabetes. This is the only study aiming to predict hypoglycemia within 24 h after SMBG collection. In this model, glucose variability, calculated as the SD of daily blood glucose and MAGE, was independently predictive of hypoglycemia just like mean blood glucose. Concerning nighttime hypoglycemic events, variability at the end of the day seemed predictive, suggesting that patients who suffer from this complication could aim at reducing glycemic fluctuations rather than let their blood glucose run higher at bedtime.

From the above, it can be concluded that glucose variability is larger in patients with diabetes who suffer from hypoglycemia, in particular severe hypoglycemia. Also, glucose variability seems a predictor of severe hypoglycemia, but it is more difficult to answer the question whether it is an independent predictor of future hypoglycemia. None of the studies reviewed here performed an analysis to examine whether glucose variability re-



mains a predictor of hypoglycemia when correcting for known predictors such as history of severe hypoglycemia and hypoglycemia unawareness. It may be useful to aim at lower glucose variability in those who suffer from severe hypoglycemia while at the same time trying to prevent a rise in mean blood glucose and HbA1c, but a specific intervention trial is lacking.

## VI. Clinical Recommendations

### A. Should glucose variability be a target for intervention?

According to the reviewed literature, glucose variability could be investigated as a separate treatment target in nondiabetic, critically ill patients, but with the introduction of strict glucose regulation at the ICU, diminishing hyperglycemic glucose excursions is already a goal of therapy (55, 66). Also, prevention and treatment of hypoglycemia will be a target anyway, although data on whether hypoglycemia in the ICU is related to increased mortality are conflicting (55, 56, 66–70). Glucose regulation with alertness for hypoglycemia should remain the intervention of choice until interventions specifically targeting variability become available and are shown to result in improved outcome.

In insulin-treated diabetes patients with severe hypoglycemia, it is often unavoidable to reduce insulin doses to avoid subsequent episodes. However, a reduction in insulin potentially leads to a deterioration of glucose control (71). Theoretically, therapies specifically aiming to lower glucose variability might prevent severe hypoglycemia while leaving general glucose regulation unaffected. Again, trials supporting this notion are lacking.

As described above, there is little evidence to target glucose variability in general for its limited effects on outcome. But one could think of other reasons to treat glucose variability on an individual basis. It has been shown that within-day variability is an independent predictor of the HbA1c achieved in type 1 diabetes patients receiving multiple daily insulin therapy, with the largest variability correlating with the highest HbA1c levels (72). One of the possible explanations for this is that glucose variability reflects unexpected hypoglycemic episodes due to a variable response to insulin injections. This might lead to patient fear of hypoglycemia and a possible deterioration of glycemic control when avoiding hypoglycemia by resisting raising insulin dosage or physical activity and a subsequent reduction in the patients' quality of life (73). Clinical investigations correlating glycemic variability and quality of life are lacking, however. Another important consequence of large intraindividual glucose variability is that the patient has to perform SMBG more frequently, which is a

burden for most diabetes patients both from a psychological and a financial point of view.

### B. Available options to target glucose variability

As for outpatients with type 1 or type 2 diabetes, long-acting insulin analogs seem to improve glucose stability; treatment with long-acting analogs has been shown to diminish hypoglycemia and glucose variability (74–76). Prandial insulins, and even more short-acting analogs, diminish postprandial hyperglycemia and consequently glucose variability specifically in type 2 diabetes patients (77, 78). In comparison to the long-acting analog insulin glargine, the glucagon-like peptide-1 receptor agonist exenatide reduced glucose variability with a similar reduction in HbA1c (79). Furthermore, compared with multiple daily insulin injections, the use of continuous sc insulin infusion is in type 1 diabetes associated with a decrease in glucose variability (60, 80, 81). Whether diminishing glycemic variability in these patient groups translates into improved outcome is unknown, although it has been shown that patients with the largest glucose variability benefit the most from switching from multiple daily insulin to continuous sc insulin infusion, achieving significant lower HbA1c values (72).

## VII. Conclusions and Future Perspectives

According to the literature we may conclude that glucose variability seems related to oxidative stress in *in vitro* and animal studies and, although not consistently, in an experimental setting in type 2 diabetes patients. In a clinical setting, glucose variability is related to mortality in nondiabetic, critically ill subjects and is associated with (severe) hypoglycemia in insulin-treated diabetes patients. However, at this time there is no supportive evidence for targeting glucose variability separately from mean glucose and/or HbA1c values.

There is no “gold standard” for determining glucose variability. Until added value for other measures is shown, a simple SD seems the best way to quantify glucose variability. CGM readings seem preferable to SMBG measurements to capture all variability, but no data are available comparing these two methods in assessing glucose variability.

The only way to establish the utility of targeting glycemic variability would be further studies specifically aimed at lowering glucose variability to investigate its influence on hard outcomes.

## Acknowledgments

Address all correspondence and requests for reprints to: S. E. Siegelar, M.D., Academic Medical Center, Department of Internal Medicine,

Meibergdreef 9, Room F4-255, 1105 AZ Amsterdam, The Netherlands.  
E-mail: s.e.siegelaar@amc.uva.nl.

This work was not supported by grants or fellowships.

Disclosure Summary: S.E.S. and J.B.L.H. have nothing to declare. F.H. has served as a paid consultant and served in an advisory board for Sanofi-Aventis. J.H.D. serves as a board member of advisory boards of NovoNordisk, has received research support from Medtronic MiniMed, and has received lecture fees from Abbott Diabetes Care.

## References

1. Brownlee M 2001 Biochemistry and molecular cell biology of diabetic complications. *Nature* 414:813–820
2. Brownlee M 2005 The pathobiology of diabetic complications: a unifying mechanism. *Diabetes* 54:1615–1625
3. The Diabetes Control and Complications Trial Research Group 1993 The effect of intensive treatment of diabetes on the development and progression of long-term complications in insulin-dependent diabetes mellitus. *N Engl J Med* 329:977–986
4. The Diabetes Control and Complications Trial Research Group 1995 The relationship of glycemic exposure (HbA1c) to the risk of development and progression of retinopathy in the diabetes control and complications trial. *Diabetes* 44:968–983
5. Brownlee M, Hirsch IB 2006 Glycemic variability: a hemoglobin A1c-independent risk factor for diabetic complications. *JAMA* 295:1707–1708
6. Lachin JM, Genuth S, Nathan DM, Zinman B, Rutledge BN, for the DCCT/EDIC Research Group 2008 Effect of glycemic exposure on the risk of microvascular complications in the Diabetes Control and Complications Trial—Revisited. *Diabetes* 57:995–1001
7. da Costa Santos CM, de Mattos Pimenta CA, Nobre MR 2007 The PICO strategy for the research question construction and evidence search. *Revista Latino-Americana de Enfermagem* 15:508–511
8. Ceriello A, Piconi L, Quagliaro L, Wang Y, Schnabel CA, Ruggles JA, Gloster MA, Maggs DG, Weyer C 2005 Effects of pramlintide on postprandial glucose excursions and measures of oxidative stress in patients with type 1 diabetes. *Diabetes Care* 28:632–637
9. Schlichtkrull J, Munck O, Jersild M 1965 the M-value, an index of blood sugar control in diabetics. *Acta Med Scand* 177: 95–102
10. Wójcicki JM 1995 Mathematical descriptions of the glucose control in diabetes therapy. Analysis of the Schlichtkrull “M”-value. *Horm Metab Res* 27:1–5
11. Service FJ, Molnar GD, Rosevear JW, Ackerman E, Gatewood LC, Taylor WF 1970 Mean amplitude of glycemic excursions, a measure of diabetic instability. *Diabetes* 19:644–655
12. McDonnell CM, Donath SM, Vidmar SI, Werther GA, Cameron FJ 2005 A novel approach to continuous glucose analysis utilizing glycemic variation. *Diabetes Technol Ther* 7:253–263
13. Molnar GD, Taylor WF, Ho MM 1972 Day-to-day variation of continuously monitored glycaemia. *Diabetologia* 8:342–348
14. Shima K, Tanaka R, Morishita S, Tarui S, Kumahara Y 1977 Studies on the etiology of “brittle diabetes.” Relationship between diabetic instability and insulinogenic reserve. *Diabetes* 26:717–725
15. McCall AL, Cox DJ, Crean J, Gloster M, Kovatchev BP 2006 A novel analytical method for assessing glucose variability: using CGMS in type 1 diabetes mellitus. *Diabetes Technol Ther* 8:644–653
16. Kovatchev BP, Cox DJ, Gonder-Frederick LA, Clarke W 1997 Symmetrization of the blood glucose measurement scale and its applications. *Diabetes Care* 20:1655–1658
17. Kovatchev BP, Clarke WL, Breton M, Brayman K, McCall A 2005 Quantifying temporal glucose variability in diabetes via continuous glucose monitoring: mathematical methods and clinical application. *Diabetes Technol Ther* 7:849–862
18. Moberg E, Kollind M, Lins PE, Adamson U 1993 Estimation of blood-glucose variability in patients with insulin-dependent diabetes mellitus. *Scand J Clin Lab Invest* 53:507–514
19. Wójcicki JM 1995 “J”-index. A new proposition of the assessment of current glucose control in diabetic patients. *Horm Metab Res* 27:41–42
20. Ryan EA, Shandro T, Green K, Paty BW, Senior PA, Bigam D, Shapiro AM, Vantyghem MC 2004 Assessment of the severity of hypoglycemia and glycemic lability in type 1 diabetic subjects undergoing islet transplantation. *Diabetes* 53:955–962
21. Wentholt IM, Kulik W, Michels RP, Hoekstra JB, DeVries JH 2008 Glucose fluctuations and activation of oxidative stress in type 1 diabetes patients. *Diabetologia* 51:183–190
22. Bugler J, Buell H 2008 Measuring glycemic variability—an estimation of data required based on a 90 day user study. Proc of 27th Workshop of the Artificial Insulin Delivery/Pancreas and Islet Transplantation study group of the European Association for the Study of Diabetes, Innsbruck, Austria, 2008 (Abstract S16)
23. Kishimoto M, Yamasaki Y, Kubota M, Arai K, Morishima T, Kawamori R, Kamada T 1995 1,5-Anhydro-D-glucitol evaluates daily glycemic excursions in well-controlled NIDDM. *Diabetes Care* 18:1156–1159
24. Buse JB, Freeman JL, Edelman SV, Jovanovic L, McGill JB 2003 Serum 1,5-anhydroglucitol (GlycoMark): a short-term glycemic marker. *Diabetes Technol Ther* 5:355–363
25. Mehta S, Bucey N, Volkening L, Svoren B, Wood J, Laffel L, Utility of 1,5-anhydroglucitol (1,5-AG) in assessing glycemia among youth and young adults with type 1 diabetes (T1D). Program of the 69th Annual Meeting of The American Diabetes Association, New Orleans, LA, 2009 (Abstract 1802-P)
26. Kuenen J, Borg R, Button E, Nathan D, Zheng H, Kostense P, Heine R, Diamant M, 1,5-Anhydroglucitol concentrations and measures of glucose control and glucose variability in T1DM and T2DM patients. Program of the 69th Annual Meeting of The American Diabetes Association, New Orleans, LA, 2009 (Abstract 882-P)
27. Jay D, Hitomi H, Griendling KK 2006 Oxidative stress and diabetic cardiovascular complications. *Free Radic Biol Med* 40:183–192
28. Lonn E, Yusuf S, Hoogwerf B, Pogue J, Yi Q, Zinman B, Bosch J, Dagenais G, Mann JF, Gerstein HC 2002 Effects of vitamin E on cardiovascular and microvascular outcomes in high-risk patients with diabetes: results of the HOPE Study and MICRO-HOPE Substudy. *Diabetes Care* 25:1919–1927
29. Quagliaro L, Piconi L, Assaloni R, Martinelli L, Motz E, Ceriello A 2003 Intermittent high glucose enhances apoptosis related to oxidative stress in human umbilical vein endothelial cells: the role of protein kinase C and NAD(P)H-oxidase activation. *Diabetes* 52:2795–2804

30. Piconi L, Quagliaro L, Assaloni R, Da Ros R, Maier A, Zuodar G, Ceriello A 2006 Constant and intermittent high glucose enhances endothelial cell apoptosis through mitochondrial superoxide overproduction. *Diabetes Metab Res Rev* 22:198–203
31. Takeuchi A, Throckmorton DC, Brogden AP, Yoshizawa N, Rasmussen H, Kashgarian M 1995 Periodic high extracellular glucose enhances production of collagens III and IV by mesangial cells. *Am J Physiol* 268:F13–F19
32. Mauer SM, Steffes MW, Ellis EN, Sutherland DE, Brown DM, Goetz FC 1984 Structural-functional relationships in diabetic nephropathy. *J Clin Invest* 74:1143–1155
33. Steffes MW, Bilous RW, Sutherland DE, Mauer SM 1992 Cell and matrix components of the glomerular mesangium in type I diabetes. *Diabetes* 41:679–684
34. Jones SC, Saunders HJ, Qi W, Pollock CA 1999 Intermittent high glucose enhances cell growth and collagen synthesis in cultured human tubulointerstitial cells. *Diabetologia* 42:1113–1119
35. Esposito C, Liu ZH, Striker GE, Phillips C, Chen NY, Chen WY, Kopchick JJ, Striker LJ 1996 Inhibition of diabetic nephropathy by a GH antagonist: a molecular analysis. *Kidney Int* 50:506–514
36. Flyvbjerg A, Orskov H 1990 Kidney tissue insulin-like growth factor I and initial renal growth in diabetic rats: relation to severity of diabetes. *Acta Endocrinol (Copenh)* 122:374–378
37. Horváth EM, Benko R, Kiss L, Murányi M, Pék T, Fekete K, Bárány T, Somlai A, Csordás A, Szabo C 2009 Rapid ‘glycaemic swings’ induce nitrosative stress, activate poly-(ADP-ribose) polymerase and impair endothelial function in a rat model of diabetes mellitus. *Diabetologia* 52:952–961
38. Ceriello A, Esposito K, Piconi L, Ihnat MA, Thorpe JE, Testa R, Boemi M, Giugliano D 2008 Oscillating glucose is more deleterious to endothelial function and oxidative stress than mean glucose in normal and type 2 diabetic patients. *Diabetes* 57:1349–1354
39. de Vries JH, Noorda RJ, Voetberg GA, van der Veen EA 1991 Growth hormone release after the sequential use of growth hormone releasing factor and exercise. *Horm Metab Res* 23:397–398
40. Monnier L, Mas E, Ginet C, Michel F, Villon L, Cristol JP, Colette C 2006 Activation of oxidative stress by acute glucose fluctuations compared with sustained chronic hyperglycemia in patients with type 2 diabetes. *JAMA* 295:1681–1687
41. Siegelaar SE, Barwari T, Kulik W, Hoekstra JB, DeVries JH, No relationship between glucose variability and oxidative stress in type 2 diabetes patients. Program of the 45th Annual Meeting of the European Association for the Study of Diabetes, Vienna, 2009 (Abstract 179)
42. Siegelaar SE, Kulik W, van Lenthe H, Mukherjee R, Hoekstra JB, DeVries JH 2009 A randomized controlled trial comparing the effect of basal insulin and inhaled mealtime insulin on glucose variability and oxidative stress. *Diabetes Obes Metab* 11:709–714
43. Kilpatrick ES, Rigby AS, Atkin SL 2006 The effect of glucose variability on the risk of microvascular complications in type 1 diabetes. *Diabetes Care* 29:1486–1490
44. Kilpatrick ES, Rigby AS, Atkin SL 2007 Variability in the relationship between mean plasma glucose and HbA1c: implications for the assessment of glycemic control. *Clin Chem* 53:897–901
45. Kilpatrick ES, Rigby AS, Atkin SL 2008 A1c variability and the risk of microvascular complications in type 1 diabetes: data from the DCCT. *Diabetes Care* 31:2198–2202
46. Bragd J, Adamson U, Bäcklund LB, Lins PE, Moberg E, Oskarsson P 2008 Can glycaemic variability, as calculated from blood glucose self-monitoring, predict the development of complications in type 1 diabetes over a decade? *Diabetes Metab* 34:612–616
47. Siegelaar SE, Kilpatrick ES, Rigby AS, Atkin SL, Hoekstra JB, DeVries JH 2009 Glucose variability does not contribute to the development of peripheral and autonomic neuropathy in type 1 diabetes: data from the DCCT. *Diabetologia* 52:2229–2232
48. Dossett LA, Cao H, Mowery NT, Dortch MJ, Morris Jr JM, May AK 2008 Blood glucose variability is associated with mortality in the surgical intensive care unit. *Am Surg* 74: 679–685
49. Egi M, Bellomo R, Stachowski E, French CJ, Hart G 2006 Variability of blood glucose concentration and short-term mortality in critically ill patients. *Anesthesiology* 105:244–252
50. Krinsley JS 2008 Glycemic variability: a strong independent predictor of mortality in critical ill patients. *Crit Care Med* 36:3008–3013
51. Hirshberg E, Larsen G, Van Duker H 2008 Alterations in glucose homeostasis in the pediatric intensive care unit: hyperglycemia and glucose variability are associated with increased mortality and morbidity. *Pediatr Crit Care Med* 9:361–366
52. Wintergerst KA, Buckingham B, Gandrud L, Wong BJ, Kache S, Wilson DM 2006 Association of hypoglycemia, hyperglycemia, and glucose variability with morbidity and death in the pediatric intensive care unit. *Pediatrics* 118: 173–179
53. Gimeno-Orna JA, Castro-Alonso FJ, Boned-Juliani B, Lou- Arnal LM 2003 Fasting plasma glucose variability as a risk factor of retinopathy in type 2 diabetic patients. *J Diabetes Complications* 17:78–81
54. Raz I, Wilson PW, Strojek K, Kowalska I, Bozikov V, Gitt AK, Jermendy G, Campaigne BN, Kerr L, Milicevic Z, Jacober SJ 2009 Effects of prandial versus fasting glycemia on cardiovascular outcomes in type 2 diabetes: the HEART2D trial. *Diabetes Care* 32:381–386
55. van den Bergh E, Wouters P, Weekers F, Verwaest C, Bruyninckx F, Schetz M, Vlasselaers D, Ferdinande P, Lauwers P, Bouillon R 2001 Intensive insulin therapy in critically ill patients. *N Engl J Med* 345:1359–1367
56. Finfer S, Chittock DR, Su SY, Blair D, Foster D, Dhingra V, Bellomo R, Cook D, Dodek P, Henderson WR, Hébert PC, Heritier S, Heyland DK, McArthur C, McDonald E, Mitchell I, Myburgh JA, Norton R, Potter J, Robinson BG, Ronco JJ; The NICE-SUGAR Study Investigators 2009 Intensive versus conventional glucose control in critically ill patients. *N Engl J Med* 360:1283–1297
57. The Diabetes Control and Complications Trial Research Group 1997 Hypoglycemia in the Diabetes Control and Complications Trial. *Diabetes* 46:271–286
58. Gold AE, Frier BM, MacLeod KM, Deary IJ 1997 A structural equation model for predictors of severe hypoglycaemia in patients with insulin-dependent diabetes mellitus. *Diabet Med* 14:309–315
59. Kovatchev BP, Cox DJ, Farhy LS, Straume M, Gonder-



- Frederick L, Clarke WL 2000 Episodes of severe hypoglycemia in type 1 diabetes are preceded and followed within 48 hours by measurable disturbances in blood glucose. *J Clin Endocrinol Metab* 85:4287–4292
60. Jaha GS, Karaviti LP, Anderson B, Smith EO, Donaldson S, McGirk TS, Haymond MW 2005 Insulin pump therapy in preschool children with type 1 diabetes mellitus improves glycemic control and decreases glucose excursions and the risk of hypoglycemia. *Diabetes Technol Ther* 7:876–884
  61. Kudva YC, Basu A, Jenkins GD, Pons GM, Vogelsang DA, Rizza RA, Smith SA, Isley WL 2007 Glycemic variation and hypoglycemia in patients with well-controlled type 1 diabetes on a multiple daily insulin injection program with use of glargine and ultralente as basal insulin. *Endocr Pract* 13:244–250
  62. Saudek CD, Duckworth WC, Giobbie-Hurder A, Henderson WG, Henry RR, Kelley DE, Edelman SV, Zieve FJ, Adler RA, Anderson JW, Anderson RJ, Hamilton BP, Donner TW, Kirkman MS, Morgan NA 1996 Implantable insulin pump vs multiple-dose insulin for non-insulin-dependent diabetes mellitus: a randomized clinical trial. Department of Veterans Affairs Implantable Insulin Pump Study Group. *JAMA* 276:1322–1327
  63. Cox DJ, Kovatchev BP, Julian DM, Gonder-Frederick LA, Polonsky WH, Schlundt DG, Clarke WL 1994 Frequency of severe hypoglycemia in insulin-dependent diabetes mellitus can be predicted from self-monitoring blood glucose data. *J Clin Endocrinol Metab* 79:1659–1662
  64. Murata GH, Hoffman RM, Shah JH, Wendel CS, Duckworth WC 2004 A probabilistic model for predicting hypoglycemia in type 2 diabetes mellitus: the Diabetes Outcomes in Veterans Study (DOVES). *Arch Intern Med* 164:1445–1450
  65. Kilpatrick ES, Rigby AS, Goode K, Atkin SL 2007 Relating mean blood glucose and glucose variability to the risk of multiple episodes of hypoglycaemia in type 1 diabetes. *Diabetologia* 50:2553–2561
  66. Van den Berghe G, Wilmer A, Hermans G, Meersseman W, Wouters PJ, Milants I, Van Wijngaerden E, Bobbaers H, Bouillon R 2006 Intensive insulin therapy in the medical ICU. *N Engl J Med* 354:449–461
  67. Krinsley JS 2004 Effect of an intensive glucose management protocol on the mortality of critically ill adult patients. *Mayo Clin Proc* 79:992–1000
  68. Vriesendorp TM, DeVries JH, van Santen S, Moeniralam HS, de Jonge E, Roos YB, Schultz MJ, Rosendaal FR, Hoekstra JB 2006 Evaluation of short-term consequences of hypoglycemia in the Intensive Care Unit. *Crit Care Med* 34:2714–2718
  69. Brunkhorst FM, Engel C, Bloos F, Meier-Hellmann A, Ragaller M, Weiler N, Moerer O, Gruendling M, Oppert M, Grond S, Olthoff D, Jaschinski U, John S, Rossaint R, Welte T, Schaefer M, Kern P, Kuhnt E, Kiehntopf M, Hartog C, Natanson C, Loeffler M, Reinhart K, the German Competence Network Sepsis (SepNet) 2008 Intensive insulin therapy and pentastarch resuscitation in severe sepsis. *N Engl J Med* 358:125–139
  70. Devos P, Preiser JC, Melot C 2007 Impact of tight glucose control by intensive insulin therapy on ICU mortality and the rate of hypoglycemia: final results of the Glucontrol study. *Intensive Care Med* 33(Suppl 2):S189
  71. The Diabetes Control and Complications Trial Research Group 1996 The absence of a glycemic threshold for the development of long-term complications: the perspective of the Diabetes Control and Complications Trial. *Diabetes* 45:1289–1298
  72. Pickup JC, Kidd J, Burmiston S, Yemane N 2006 Determinants of glycaemic control in type 1 diabetes during intensified therapy with multiple daily insulin injections or continuous subcutaneous insulin infusion: importance of blood glucose variability. *Diabetes Metab Res Rev* 22:232–237
  73. Hartman I 2008 Insulin analogs: impact on treatment success, satisfaction, quality of life, and adherence. *Clin Med Res* 6:54–67
  74. Riddle MC, Rosenstock J, Gerich J 2003 The Treat-to-Target Trial: randomized addition of glargine or human NPH insulin to oral therapy of type 2 diabetic patients. *Diabetes Care* 26:3080–3086
  75. Hermansen K, Davies M, Derezinski T, Martinez Ravn G, Clauson P, Home P, on behalf of the Levemir Treat-to-Target Study Group 2006 A 26-week, randomized, parallel, treat-to-target trial comparing insulin detemir with NPH insulin as add-on therapy to oral glucose-lowering drugs in insulin-naïve people with type 2 diabetes. *Diabetes Care* 29:1269–1274
  76. White NH, Chase HP, Arslanian S, Tamborlane WV 2009 A comparison of glycemic variability associated with insulin glargine and intermediate-acting insulin when used as the basal component of multiple daily injections for adolescents with type 1 diabetes. *Diabetes Care* 32:387–393
  77. Anderson Jr JH, Brunelle RL, Keohane P, Koivisto VA, Trautmann ME, Vignati L, DiMarchi R 1997 Mealtime treatment with insulin analog improves postprandial hyperglycemia and hypoglycemia in patients with non-insulin-dependent diabetes mellitus. Multicenter Insulin Lispro Study Group. *Arch Intern Med* 157:1249–1255
  78. Kang S, Creagh FM, Peters JR, Brange J, Vølund A, Owens DR 1991 Comparison of subcutaneous soluble human insulin and insulin analogues (AspB9, GluB27; AspB10; AspB28) on meal-related plasma glucose excursions in type I diabetic subjects. *Diabetes Care* 14:571–577
  79. McCall AL, Cox DJ, Brodows R, Crean J, Johns D, Kovatchev B 2009 Reduced daily risk of glycemic variability: comparison of exenatide with insulin glargine. *Diabetes Technol Ther* 11:339–344
  80. Bruttomesso D, Crazzolara D, Maran A, Costa S, Dal Pos M, Girelli A, Lepore G, Aragona M, Iori E, Valentini U, Del Prato S, Tiengo A, Buhr A, Trevisan R, Baritussio A 2008 In type 1 diabetic patients with good glycaemic control, blood glucose variability is lower during continuous subcutaneous insulin infusion than during multiple daily injections with insulin glargine. *Diabet Med* 25:326–332
  81. Alemzadeh R, Palma-Sisto P, Holzum M, Parton E, Kicher J 2007 Continuous subcutaneous insulin infusion attenuated glycemic instability in preschool children with type 1 diabetes mellitus. *Diabetes Technol Ther* 9:339–347
